# Supplementary material for: Selective enrichment of metal-binding proteins based on magnetic core/shell microspheres functionalized with metal cations
Source: Royal Society of Chemistry journal article supplement (doi:10.1039/c5an00599j), 2015-01-01
Supplement: c5an00599j1.xlsx [file c5an00599j1.xlsx]

## Sheet: Supplementary table
Supplementary table: Summary of all identified proteins in rat liver.
Accession No.	Protein Description	Reported or Not in UniProt Database
P62260	14-3-3 protein epsilon	No
P68255	14-3-3 protein theta	No
P63102	14-3-3 protein zeta/delta	No
Q5M875	17-beta-hydroxysteroid dehydrogenase 13	No
P10686	1-phosphatidylinositol 4,5-bisphosphate phosphodiesterase gamma-1	Metal-Binding Protein
Q64591	2,4-dienoyl-CoA reductase, mitochondrial	No
P23457	3-alpha-hydroxysteroid dehydrogenase	No
O70351	3-hydroxyacyl-CoA dehydrogenase type-2	No
P46953	3-hydroxyanthranilate 3,4-dioxygenase	Metal-Binding Protein
P07871	3-ketoacyl-CoA thiolase B, peroxisomal	No
P13437	3-ketoacyl-CoA thiolase, mitochondrial	No
P97532	3-mercaptopyruvate sulfurtransferase	No
P24008	3-oxo-5-alpha-steroid 4-dehydrogenase 1	No
P31210	3-oxo-5-beta-steroid 4-dehydrogenase	No
P63324	40S ribosomal protein S12	No
P62246	40S ribosomal protein S15a	No
P27952	40S ribosomal protein S2	No
P62909	40S ribosomal protein S3	No
P62703	40S ribosomal protein S4, X isoform	No
P62083	40S ribosomal protein S7	No
P62243	40S ribosomal protein S8	No
P38983	40S ribosomal protein SA	No
P50554	4-aminobutyrate aminotransferase, mitochondrial	Metal-Binding Protein
P32755	4-hydroxyphenylpyruvate dioxygenase	Metal-Binding Protein
Q9JLJ3	4-trimethylaminobutyraldehyde dehydrogenase	No
P63039	60 kDa heat shock protein, mitochondrial	No
P19945	60S acidic ribosomal protein P0	No
P19944	60S acidic ribosomal protein P1	No
P02401	60S acidic ribosomal protein P2	No
Q6PDV7	60S ribosomal protein L10	No
P23358	60S ribosomal protein L12	No
P12001	60S ribosomal protein L18	No
P62718	60S ribosomal protein L18a	No
P84100	60S ribosomal protein L19	No
P21531	60S ribosomal protein L3	No
P62890	60S ribosomal protein L30	No
P62902	60S ribosomal protein L31	No
P50878	60S ribosomal protein L4	No
P21533	60S ribosomal protein L6	No
P05426	60S ribosomal protein L7	No
P62425	60S ribosomal protein L7a	No
P62919	60S ribosomal protein L8	No
P85968	6-phosphogluconate dehydrogenase, decarboxylating	No
P06761	78 kDa glucose-regulated protein	No
P49911	Acidic leucine-rich nuclear phosphoprotein 32 family member A	No
P60711	Actin, cytoplasmic 1	No
Q499N5	Acyl-CoA synthetase family member 2, mitochondrial	No
O55171	Acyl-coenzyme A thioesterase 2, mitochondrial	No
Q64640	Adenosine kinase	Metal-Binding Protein
P10760	Adenosylhomocysteinase	No
P29410	Adenylate kinase 2, mitochondrial	No
Q09073	ADP/ATP translocase 2	No
P06757	Alcohol dehydrogenase 1	Metal-Binding Protein
P12711	Alcohol dehydrogenase class-3	Metal-Binding Protein
P50235	Alcohol sulfotransferase	No
Q66HF8	Aldehyde dehydrogenase X, mitochondrial	No
P13601	Aldehyde dehydrogenase, cytosolic 1	No
P11884	Aldehyde dehydrogenase, mitochondrial	No
Q5RJP0	Aldose reductase-related protein 1	No
P24090	Alpha-2-HS-glycoprotein	No
Q9Z1P2	Alpha-actinin-1	Metal-Binding Protein
Q64057	Alpha-aminoadipic semialdehyde dehydrogenase	No
P04764	Alpha-enolase	Metal-Binding Protein
P70473	Alpha-methylacyl-CoA racemase	No
P41034	Alpha-tocopherol transfer protein	No
P21396	Amine oxidase [flavin-containing] A	No
P02650	Apolipoprotein E	Metal Chelating Activity
P07824	Arginase-1	Metal-Binding Protein
P20673	Argininosuccinate lyase	No
P09034	Argininosuccinate synthase	No
Q9QZH8	Arylacetamide deacetylase	No
P00507	Aspartate aminotransferase, mitochondrial	No
P15999	ATP synthase subunit alpha, mitochondrial	No
P19511	ATP synthase subunit b, mitochondrial	No
P10719	ATP synthase subunit beta, mitochondrial	Metal-Binding Protein
P31399	ATP synthase subunit d, mitochondrial	No
P35434	ATP synthase subunit delta, mitochondrial	No
P35435	ATP synthase subunit gamma, mitochondrial	No
Q06647	ATP synthase subunit O, mitochondrial	No
P16638	ATP-citrate synthase	Metal-Binding Protein
O09171	Betaine--homocysteine S-methyltransferase 1	Metal-Binding Protein
Q03248	Beta-ureidopropionase	Metal-Binding Protein
Q4KLZ6	Bifunctional ATP-dependent dihydroxyacetone kinase/FAD-AMP lyase (cyclizing)	Metal-Binding Protein
O35826	Bifunctional UDP-N-acetylglucosamine 2-epimerase/N-acetylmannosamine kinase	Metal-Binding Protein
Q63276	Bile acid-CoA:amino acid N-acyltransferase	No
Q9ES38	Bile acyl-CoA synthetase	No
P15709	Bile salt sulfotransferase	Metal-Binding Protein
P62161	Calmodulin	Metal-Binding Protein
P97571	Calpain-1 catalytic subunit	Metal-Binding Protein
P18418	Calreticulin	Metal-Binding Protein
P07756	Carbamoyl-phosphate synthase [ammonia], mitochondrial	Metal-Binding Protein
P14141	Carbonic anhydrase 3	Metal-Binding Protein
P04762	Catalase	Metal-Binding Protein
P22734	Catechol O-methyltransferase	Metal-Binding Protein
Q8CFN2	Cell division control protein 42 homolog	No
Q6UPE0	Choline dehydrogenase, mitochondrial	No
P11442	Clathrin heavy chain 1	No
P45592	Cofilin-1	No
P97536	Cullin-associated NEDD8-dissociated protein 1	No
P18757	Cystathionine gamma-lyase	Calmodulin-Binding Protein
P00173	Cytochrome b5	Metal-Binding Protein
Q68FY0	Cytochrome b-c1 complex subunit 1, mitochondrial	Metal-Binding Protein
P11240	Cytochrome c oxidase subunit 5A, mitochondrial	Metal-Binding Protein
P04799	Cytochrome P450 1A2	Metal-Binding Protein
P11711	Cytochrome P450 2A1	Metal-Binding Protein
P11510	Cytochrome P450 2C12, female-specific	Metal-Binding Protein
P05178	Cytochrome P450 2C6	Metal-Binding Protein
P05179	Cytochrome P450 2C7	Metal-Binding Protein
P10633	Cytochrome P450 2D1	Metal-Binding Protein
P12939	Cytochrome P450 2D10	Metal-Binding Protein
P33274	Cytochrome P450 4F1	Metal-Binding Protein
Q63270	Cytoplasmic aconitate hydratase	Metal-Binding Protein
Q68FS4	Cytosol aminopeptidase	Metal-Binding Protein
P28037	Cytosolic 10-formyltetrahydrofolate dehydrogenase	No
P29147	D-beta-hydroxybutyrate dehydrogenase, mitochondrial	Response to Cadmium Ion
P80254	D-dopachrome decarboxylase	No
P0C2X9	Delta-1-pyrroline-5-carboxylate dehydrogenase, mitochondrial	No
P06214	Delta-aminolevulinic acid dehydratase	Metal-Binding Protein
Q6P6R2	Dihydrolipoyl dehydrogenase, mitochondrial	No
Q63150	Dihydropyrimidinase	Metal-Binding Protein
Q8K4C0	Dimethylaniline monooxygenase [N-oxide-forming] 5	No
Q5RKL4	Dimethylglycine dehydrogenase	No
Q63342	Dimethylglycine dehydrogenase, mitochondrial	No
Q641Y0	Dolichyl-diphosphooligosaccharide--protein glycosyltransferase 48 kDa subunit	No
P25235	Dolichyl-diphosphooligosaccharide--protein glycosyltransferase subunit 2	No
P13803	Electron transfer flavoprotein subunit alpha, mitochondrial	No
Q68FU3	Electron transfer flavoprotein subunit beta	No
Q6UPE1	Electron transfer flavoprotein-ubiquinone oxidoreductase, mitochondrial	Metal-Binding Protein
P62630	Elongation factor 1-alpha 1	No
Q68FR6	Elongation factor 1-gamma	No
P05197	Elongation factor 2	No
Q66HD0	Endoplasmin	Interacts with MZB1 in a calcium-dependent manner
Q5XIC0	Enoyl-CoA delta isomerase 2, mitochondrial	No
P14604	Enoyl-CoA hydratase, mitochondrial	No
P07687	Epoxide hydrolase 1	No
Q6AYS8	Estradiol 17-beta-dehydrogenase 11	No
Q4KM77	Etoposide-induced protein 2.4 homolog	No
Q5RKI1	Eukaryotic initiation factor 4A-II	No
Q3T1J1	Eukaryotic translation initiation factor 5A-1	No
P05369	Farnesyl pyrophosphate synthase	Metal-Binding Protein
P12785	Fatty acid synthase	Metal-Binding Protein
P55053	Fatty acid-binding protein, epidermal	No
P02692	Fatty acid-binding protein, liver	No
P30839	Fatty aldehyde dehydrogenase	No
P97612	Fatty-acid amide hydrolase 1	No
O88618	Formimidoyltransferase-cyclodeaminase	No
P00884	Fructose-bisphosphate aldolase B	No
P25093	Fumarylacetoacetase	Metal-Binding Protein
Q07071	Glucokinase regulatory protein	No
P10860	Glutamate dehydrogenase 1, mitochondrial	No
P09606	Glutamine synthetase	Metal-Binding Protein
P04041	Glutathione peroxidase 1	Metal-Binding Protein
P00502	Glutathione S-transferase alpha-1	No
P04903	Glutathione S-transferase alpha-2	No
P04904	Glutathione S-transferase alpha-3	No
P04905	Glutathione S-transferase Mu 1	Metal-Binding Protein
P08010	Glutathione S-transferase Mu 2	Response to Metal Ion
P04797	Glyceraldehyde-3-phosphate dehydrogenase	No
O35077	Glycerol-3-phosphate dehydrogenase [NAD(+)], cytoplasmic	No
Q5I0P2	Glycine cleavage system H protein, mitochondrial	No
P13255	Glycine N-methyltransferase	No
P09811	Glycogen phosphorylase, liver form	No
P23785	Granulins	No
Q5HZY2	GTP-binding protein SAR1b	Metal-Binding Protein
P63245	Guanine nucleotide-binding protein subunit beta-2-like 1	No
P06866	Haptoglobin	Hemoglobin Binding Protein
P55063	Heat shock 70 kDa protein 1-like	No
P63018	Heat shock cognate 71 kDa protein	No
P82995	Heat shock protein HSP 90-alpha	No
P34058	Heat shock protein HSP 90-beta	No
P01946	Hemoglobin subunit alpha-1/2	Metal-Binding Protein
P02091	Hemoglobin subunit beta-1	Metal-Binding Protein
Q794E4	Heterogeneous nuclear ribonucleoprotein F	No
P61980	Heterogeneous nuclear ribonucleoprotein K	No
P21213	Histidine ammonia-lyase	No
A9UMV8	Histone H2A.J	No
Q00715	Histone H2B type 1	No
P84245	Histone H3.3	No
P62804	Histone H4	No
Q9WVK7	Hydroxyacyl-coenzyme A dehydrogenase, mitochondrial	No
P22791	Hydroxymethylglutaryl-CoA synthase, mitochondrial	Response to Metal Ion
P27605	Hypoxanthine-guanine phosphoribosyltransferase	Metal-Binding Protein
Q64632	Integrin beta-4	No
P41562	Isocitrate dehydrogenase [NADP] cytoplasmic	Metal-Binding Protein
P56574	Isocitrate dehydrogenase [NADP], mitochondrial	Metal-Binding Protein
P12007	Isovaleryl-CoA dehydrogenase, mitochondrial	No
Q5BJY9	Keratin, type I cytoskeletal 18	No
Q10758	Keratin, type II cytoskeletal 8	No
Q5SGE0	Leucine-rich PPR motif-containing protein, mitochondrial	No
P10867	L-gulonolactone oxidase	No
Q64573	Liver carboxylesterase 4	No
P04642	L-lactate dehydrogenase A chain	No
P15650	Long-chain specific acyl-CoA dehydrogenase, mitochondrial	No
P18163	Long-chain-fatty-acid--CoA ligase 1	Metal-Binding Protein
O88813	Long-chain-fatty-acid--CoA ligase 5	Metal-Binding Protein
Q920P0	L-xylulose reductase	No
P30904	Macrophage migration inhibitory factor	No
O88989	Malate dehydrogenase, cytoplasmic	No
P04636	Malate dehydrogenase, mitochondrial	No
P57113	Maleylacetoacetate isomerase	No
P08503	Medium-chain specific acyl-CoA dehydrogenase, mitochondrial	No
P70580	Membrane-associated progesterone receptor component 1	Heme Binding
Q02253	Methylmalonate-semialdehyde dehydrogenase [acylating], mitochondrial	No
Q562C4	Methyltransferase-like protein 7B	No
P08011	Microsomal glutathione S-transferase 1	No
Q03626	Murinoglobulin-1	No
Q64119	Myosin light polypeptide 6	Metal-Binding Protein
P13832	Myosin regulatory light chain RLC-A	Metal-Binding Protein
Q62812	Myosin-9	Calmodulin-Binding Protein
P19234	NADH dehydrogenase [ubiquinone] flavoprotein 2, mitochondrial	Metal-Binding Protein
P20070	NADH-cytochrome b5 reductase 3	No
Q8CGU6	Nicastrin	No
P11915	Non-specific lipid-transfer protein	No
Q63083	Nucleobindin-1	Metal-Binding Protein
P13383	Nucleolin	No
P19804	Nucleoside diphosphate kinase B	Metal-Binding Protein
P04182	Ornithine aminotransferase, mitochondrial	No
P00481	Ornithine carbamoyltransferase, mitochondrial	Response to Zinc Ion
P04550	Parathymosin	Metal-Binding Protein
P10111	Peptidyl-prolyl cis-trans isomerase A	No
Q63716	Peroxiredoxin-1	Heme Binding
P35704	Peroxiredoxin-2	No
O35244	Peroxiredoxin-6	No
P97562	Peroxisomal acyl-coenzyme A oxidase 2	No
Q63448	Peroxisomal acyl-coenzyme A oxidase 3	No
P07896	Peroxisomal bifunctional enzyme	No
P97852	Peroxisomal multifunctional enzyme type 2	No
Q9WVK3	Peroxisomal trans-2-enoyl-CoA reductase	No
P04176	Phenylalanine-4-hydroxylase	Metal-Binding Protein
P16036	Phosphate carrier protein, mitochondrial	No
P31044	Phosphatidylethanolamine-binding protein 1	Response to Calcium Ion
Q9ES21	Phosphatidylinositide phosphatase SAC1	No
P16617	Phosphoglycerate kinase 1	No
Q9EPH8	Polyadenylate-binding protein 1	No
P67779	Prohibitin	No
Q5XIH7	Prohibitin-2	No
P04785	Protein disulfide-isomerase	No
P11598	Protein disulfide-isomerase A3	Metal-Binding Protein
P38659	Protein disulfide-isomerase A4	Metal-Binding Protein
Q63081	Protein disulfide-isomerase A6	Metal-Binding Protein
Q62902	Protein ERGIC-53	Metal-Binding Protein
P61621	Protein transport protein Sec61 subunit alpha isoform 1	No
P61459	Pterin-4-alpha-carbinolamine dehydratase	No
P85973	Purine nucleoside phosphorylase	No
Q5I0J9	Putative L-aspartate dehydrogenase	No
P52873	Pyruvate carboxylase, mitochondrial	Metal-Binding Protein
P12928	Pyruvate kinase PKLR	Metal-Binding Protein
P50399	Rab GDP dissociation inhibitor beta	No
Q6NYB7	Ras-related protein Rab-1A	No
Q03336	Regucalcin	Metal-Binding Protein
P50169	Retinol dehydrogenase 3	No
P02696	Retinol-binding protein 1	No
P13444	S-adenosylmethionine synthase isoform type-1	Metal-Binding Protein
Q64380	Sarcosine dehydrogenase, mitochondrial	No
Q8VIF7	Selenium-binding protein 1	Metal-Binding Protein
Q09167	Serine/arginine-rich splicing factor 5	No
P02770	Serum albumin	Metal-Binding Protein
P55159	Serum paraoxonase/arylesterase 1	Metal-Binding Protein
Q68FP2	Serum paraoxonase/lactonase 3	Metal-Binding Protein
B0BNE5	S-formylglutathione hydrolase	No
P70584	Short/branched chain specific acyl-CoA dehydrogenase, mitochondrial	No
O35412	Signal-induced proliferation-associated 1-like protein 1	No
Q68FT5	S-methylmethionine--homocysteine S-methyltransferase BHMT2	Metal-Binding Protein
P27867	Sorbitol dehydrogenase	Metal-Binding Protein
P16086	Spectrin alpha chain, non-erythrocytic 1	Metal-Binding Protein
Q5PPL3	Sterol-4-alpha-carboxylate 3-dehydrogenase, decarboxylating	No
P48721	Stress-70 protein, mitochondrial	No
Q920L2	Succinate dehydrogenase [ubiquinone] flavoprotein subunit, mitochondrial	No
P10960	Sulfated glycoprotein 1	No
P17988	Sulfotransferase 1A1	No
P07632	Superoxide dismutase [Cu-Zn]	Metal-Binding Protein
Q68FQ0	T-complex protein 1 subunit epsilon	No
P11232	Thioredoxin	Response to Selenium Ion
Q5XHY5	Threonine--tRNA ligase, cytoplasmic	No
P46462	Transitional endoplasmic reticulum ATPase	No
P50137	Transketolase	Metal-Binding Protein
P32089	Tricarboxylate transport protein, mitochondrial	No
Q64428	Trifunctional enzyme subunit alpha, mitochondrial	No
Q60587	Trifunctional enzyme subunit beta, mitochondrial	No
P48500	Triosephosphate isomerase	No
Q63610	Tropomyosin alpha-3 chain	No
Q6P9V9	Tubulin alpha-1B chain	No
Q6AYZ1	Tubulin alpha-1C chain	No
Q5XIF6	Tubulin alpha-4A chain	No
Q6P9T8	Tubulin beta-4B chain	No
O70199	UDP-glucose 6-dehydrogenase	No
Q64550	UDP-glucuronosyltransferase 1-1	No
P09875	UDP-glucuronosyltransferase 2B1	No
P36511	UDP-glucuronosyltransferase 2B15	No
P08542	UDP-glucuronosyltransferase 2B17	No
P09118	Uricase	No
P97524	Very long-chain acyl-CoA synthetase	No
P45953	Very long-chain specific acyl-CoA dehydrogenase, mitochondrial	No
Q64232	Very-long-chain enoyl-CoA reductase	No
Q9Z2L0	Voltage-dependent anion-selective channel protein 1	No
